1 **Practical Indicators for Risk of Airborne Transmission in Shared Indoor Environments**  
2 **and their Application to COVID-19 Outbreaks**

3

4 **Z. Peng,<sup>1</sup> A.L. Pineda Rojas,<sup>2</sup> E. Kropff,<sup>3</sup> W. Bahnfleth,<sup>4</sup> G. Buonanno,<sup>5</sup> S.J. Dancer,<sup>6,7</sup> J.**

5 **Kurnitski,<sup>8</sup> Y. Li,<sup>9</sup> M.G.L.C. Loomans,<sup>10</sup> L.C. Marr,<sup>11</sup> L. Morawska,<sup>12</sup> W. Nazaroff,<sup>13</sup> C.**

6 **Noakes,<sup>14</sup> X. Querol,<sup>15</sup> C. Sekhar,<sup>16</sup> R. Tellier,<sup>17</sup> T. Greenhalgh,<sup>18</sup> L. Bourouiba,<sup>19</sup> A.**

7 **Boerstra,<sup>20</sup> J.W. Tang,<sup>21</sup> S.L. Miller,<sup>22</sup> and J.L. Jimenez<sup>1\*</sup>**

8

9 *Affiliations*

10 1. Dept. of Chemistry and CIRES; University of Colorado, Boulder, CO, USA

11 2. CIMA, UMI-IFAECI/CNRS, FCEyN, Universidad de Buenos Aires—UBA/CONICET, Buenos Aires, Argentina

12 3. Leloir Institute—IIBBA/CONICET, CBA, Buenos Aires, Argentina

13 4. Dept. of Architectural Engineering, The Pennsylvania State University, University Park, PA, USA

14 5. Dept. of Civil and Mechanical Engineering, University of Cassino and Southern Lazio, Italy

15 6. Dept. of Microbiology, NHS Lanarkshire, Scotland, UK

16 7. School of Applied Sciences, Edinburgh Napier University, Scotland, UK

17 8. REHVA Technology and Research Committee, Tallinn University of Technology, Tallinn, Estonia

18 9. Dept. of Mechanical Engineering, the University of Hong Kong, Hong Kong, China

19 10. Dept. of the Built Environment, Eindhoven University of Technology, Eindhoven, the Netherlands

20 11. Dept. of Civil and Environmental Engineering, Virginia Tech, Blacksburg, VA, USA

21 12. International Laboratory for Air Quality and Health, Queensland University of Technology, Brisbane, Australia

22 13. Dept. of Civil and Environmental Engineering, University of California, Berkeley, CA, USA

23 14. School of Civil Engineering, University of Leeds, Leeds, UK

24 15. Institute of Environmental Assessment and Water Research, IDAEA, Spanish Research Council, CSIC, Barcelona, Spain

25 16. Dept. of the Built Environment, National University of Singapore, Singapore

26 17. McGill University, Montreal, QC, Canada

27 18. Dept. of Primary Care Health Sciences, University of Oxford, Oxford, UK.

28 19. The Fluid Dynamics of Disease Transmission Laboratory, Massachusetts Institute of Technology, Cambridge, MA, USA

29 20. REHVA (Federation of European Heating, Ventilation and Air Conditioning Associations), BBA Binnenmilieu, the Netherlands

30 21. Respiratory Sciences, University of Leicester, Leicester, UK

31 22. Dept. Mechanical Engineering, University of Colorado, Boulder, CO, USA

32 \*: corresponding author: <jose.jimenez@colorado.edu>

33

34 **Abstract.** Some infectious diseases, including COVID-19, can be transmitted via aerosols that  
35 are emitted by an infectious person and inhaled by susceptible individuals. Most airborne  
36 transmission occurs at close proximity and is effectively reduced by physical distancing, but as  
37 time indoors increases, infections occur in those sharing room air despite maintaining  
38 distancing. There have been calls for quantified models to estimate the absolute and relative  
39 contribution of these different factors to infection risk. We propose two indicators of infection risk  
40 for this situation, i.e., relative risk parameter ( $H_r$ ) and risk parameter ( $H$ ). They combine the key  
41 factors that control airborne disease transmission indoors: virus-containing aerosol generation  
42 rate, breathing flow rate, masking and its quality, ventilation and particulate air cleaning rates,  
43 number of occupants, and duration of exposure. COVID-19 outbreaks show a clear trend in  
44 relation to these factors that is consistent with airborne infection. The observed trends of  
45 outbreak size (attack rate) vs.  $H$  ( $H_r$ ) allow us to recommend values of these parameters to  
46 minimize COVID-19 indoor infection risk. Transmission in typical pre-pandemic indoor spaces is  
47 highly sensitive to mitigation efforts. Previous outbreaks of measles, flu, and tuberculosis were  
48 assessed along with recently reported COVID-19 outbreaks. Measles outbreaks occur at much  
49 lower risk parameter values than COVID-19, while tuberculosis outbreaks are observed at much  
50 higher risk parameter values. Since both diseases are accepted as airborne, the fact that  
51 COVID-19 is less contagious than measles does not rule out airborne transmission. It is  
52 important that future outbreak reports include information on the nature and type of masking,  
53 ventilation and particulate-air cleaning rates, number of occupants, and duration of exposure, to  
54 allow us to understand the circumstances conducive to airborne transmission of different  
55 diseases.

56

57 **Key words**

58 COVID-19; airborne transmission; indoor air; risk assessment; mitigation

59

60 **Synopsis**

61 We propose two infection risk indicators for indoor spaces and apply them to COVID-19

62 outbreaks analysis and mitigation.

63

64

## 65 **Introduction**

66

67 Some respiratory infections can be transmitted through the airborne pathway, in which aerosol  
68 particles (< 100  $\mu\text{m}$ ) are shed by infected individuals and inhaled by others, causing disease in  
69 susceptible individuals.<sup>1-4</sup> It is widely accepted that measles, tuberculosis, and chickenpox are  
70 transmitted in this way,<sup>5,6</sup> and acceptance is growing that this is a major and potentially the  
71 dominant transmission mode of COVID-19.<sup>7-13</sup> There is substantial evidence that smallpox,<sup>14</sup>  
72 influenza,<sup>3</sup> SARS,<sup>15</sup> MERS,<sup>6</sup> and rhinovirus<sup>16</sup> are also transmitted via aerosols.

73

74 There are three airborne transmission scenarios of interest in which infectious and susceptible  
75 people: (a) are in close proximity to each other (< 1-2 m), so-called “short-range airborne  
76 transmission,”<sup>17</sup> which is effectively mitigated by physical distancing; (b) share air in the same  
77 room, “shared space airborne”; and (c) “longer-distance airborne transmission” in buildings  
78 when individuals are not sharing a room (or are in very large rooms), or even between buildings  
79 as in the Amoy Gardens SARS outbreak.<sup>15</sup> Often (b) and (c) are lumped together under “long-  
80 range transmission,” but in Scenario (c) transport of pathogen-containing air is more complex,  
81 so that the approximation of well mixed air is less valid. It is thus useful to separate these  
82 scenarios given the substantial differences in the risk of these situations and actions needed to  
83 abate the risk of transmission.

84

85 Airborne diseases vary widely in transmissibility, but all of them are most easily transmitted at  
86 short range due to the higher concentration of pathogen-containing aerosols close to the  
87 infected person. For SARS-CoV-2, a pathogen of initially moderate infectivity (more recently  
88 increased by some variants such as Delta), many instances have been reported implicating  
89 transmission in shared indoor spaces. Indeed, multiple outbreaks of COVID-19 have been

90 reported in crowded spaces that were relatively poorly ventilated and that were shared by many  
91 people for periods of half an hour or longer. Examples include choir rehearsals,<sup>11</sup> religious  
92 services,<sup>18</sup> buses,<sup>19</sup> workshop rooms,<sup>19</sup> restaurants,<sup>4,20</sup> and gyms,<sup>21</sup> among others. There are  
93 only a few documented cases of longer-distance transmission of SARS-CoV-2, in buildings.<sup>22-24</sup>  
94 However, cases of longer-distance transmission are harder to detect as they require contact  
95 tracing teams to have sufficient data to connect cases together and rule out infection acquired  
96 elsewhere. Historically, it was only possible to prove longer-distance transmission in the  
97 complete absence of community transmission (e.g. ref <sup>14</sup>).

98

99 Being able to quickly assess the risk of infection for a wide variety of indoor environments is of  
100 the utmost importance given the impact of the continuing pandemic (and the risk of future  
101 pandemics) on so many aspects of life in almost every country of the world. We urgently need to  
102 improve the safety of the air that we breathe across a range of environments including child-  
103 care facilities, kindergartens, schools, colleges, shops, offices, homes, eldercare facilities,  
104 factories, public and private transportation, restaurants, gyms, libraries, cinemas, concert halls,  
105 places of worship and mass outdoor events across different climates and socio-economic  
106 conditions. There is very little evidence on the actual ventilation rates and the effectiveness of  
107 ventilation systems at reducing risks from viral exposure and other indoor pollutants within the  
108 majority of buildings. However, data from COVID-19 outbreaks consistently show that a large  
109 fraction of buildings worldwide have very low ventilation rates despite the requirements set in  
110 national building standards. A host of policy questions – from how to safely re-open schools to  
111 how to prevent transmission in high-risk occupational settings – require accurate quantification  
112 of the multiple interacting variables that influence airborne infection risk.

113

114 Qualitative guidance to reduce the risk of airborne transmission has been published.<sup>25-27</sup>

115 Different mathematical models have been proposed to help manage risk of airborne

116 transmission,<sup>28,29</sup> and several models have been adapted to COVID-19.<sup>30–33</sup> It is important to  
117 define quantitative infection risk criteria for different spaces and types of events to more  
118 effectively manage the pandemic.<sup>34</sup> Such criteria could then be used by authorities and policy  
119 makers to assist in deciding which activities are permitted under what conditions, so as to limit  
120 infection risk across a society. To our knowledge, no such quantitative criteria have been  
121 proposed. Besides, often recommendations are complex and vague, e.g., “reduce duration and  
122 density of occupancy, and increase ventilation.” However, it is not clear how to combine the  
123 different measures together (e.g., is half the duration equivalent to doubling the ventilation?) and  
124 it is also not clear what level of mitigation is sufficient to reduce outbreak probability to a low  
125 level.

126

127 Here, we use a box model to estimate the viral aerosol concentration indoors, and combine it  
128 with the Wells-Riley infection model.<sup>28</sup> The combined model is used to derive two quantitative  
129 risk parameters that allow comparing the relative risk of transmission in different situations when  
130 sharing room air. We explore the trends in infections observed in outbreaks of COVID-19 and  
131 other diseases as a function of these parameters. Finally, we use the parameters to quantify a  
132 graphical display of the relative risk of different situations and mitigation options.

133

## 134 **Materials and Methods**

135

### 136 **Box model of infection**

137

138 The box model considers a single enclosed space, in which virus-containing aerosols are  
139 assumed to be rapidly uniformly mixed compared with the time spent by the occupants in the  
140 space. This is approximately applicable in many situations, but there are some exceptions such  
141 as outbreaks where clear directional flow occurred in a room.<sup>18,20</sup> The mathematical notation

142 used in the paper is summarized in Table S1. The mass balance equation is first written in  
143 terms of  $c$ , the concentration of infectious quanta in the air in the enclosed space (units of  
144 quanta  $m^{-3}$ ). Compared with a model written in terms of aerosol or viral particle concentrations,  $c$   
145 has the advantage of implicitly including effects such as the deposition efficiency of the aerosol  
146 particles in the lungs of a susceptible person, as well as the efficiency with which such  
147 deposited particles may cause infection, the multiplicity of infection, etc. The balance of quanta  
148 in the space can be written as:

149

$$150 \quad dc/dt = E_p f_e / V - (\lambda_0 + \lambda_{dec} + \lambda_{dep} + \lambda_{cle}) c \quad (1)$$

151

152 where  $E_p$  is the emission rate of quanta into the indoor air from an infected person present in the  
153 space (quanta / h);  $f_e$  is the penetration efficiency of virus-carrying particles through masks or  
154 face coverings for exhalation (which takes into account the impact of whether the infector wears  
155 a face covering);  $V$  is the volume of the space;  $\lambda_0$  is the first-order rate of removal of quanta by  
156 ventilation with outdoor air ( $h^{-1}$ );  $\lambda_{cle}$  is the removal of quanta by air cleaning devices (e.g.  
157 recirculated air with filtering, germicidal UV, portable air cleaners, etc.);  $\lambda_{dec}$  is the infectivity  
158 decay rate of the virus;  $\lambda_{dep}$  is the deposition rate of airborne virus-containing particles onto  
159 surfaces.  $E_p$  is a critical parameter that depends strongly on the disease, and it can be  
160 estimated with a forward model based on aerosol emission rates and pathogen concentration in  
161 saliva and respiratory fluid<sup>31,35</sup> or by fitting a model such as the one used here to real  
162 transmission events.<sup>11,31</sup>

163

164 This equation can be solved analytically or numerically for specific situations. Given the  
165 enormous number of possible situations, and given the prevalence of outbreaks resulting from  
166 longer events where air is shared for a substantial period of time, we consider a sufficiently long  
167 event so that a steady state condition ( $dc/dt \sim 0$ ) is a reasonable approximation. Writing  $\lambda = \lambda_0 +$

168  $\lambda_{cle} + \lambda_{dec} + \lambda_{dep}$  for simplicity leads to a steady-state infectious quanta concentration of:

169

$$170 \quad c = E_p f_e / (V \lambda) \quad (2)$$

171

172 Under the assumption of no infectious quanta at the beginning of the event, a multiplicative  
173 factor,  $r_{ss}$ , can be applied for events too short to approximately reach steady state (see Section  
174 S1 for detail) to correct the deviation of the quanta concentration averaged over the event ( $c_{avg}$ )  
175 from that at steady state:

176

$$177 \quad c_{avg} = r_{ss} E_p f_e / (V \lambda) \quad (3)$$

178

179 Since the goal is to analyze outbreaks, we assume that only a single infectious person is  
180 present in the space, which is thought to be applicable to the outbreaks analyzed below. This  
181 allows calculation of the probability of infection, *conditional* to one infectious person being  
182 present. The model can also be formulated to calculate the *absolute* probability of infection, if  
183 we assume that the probability of an infectious person being present reflects the prevalence of a  
184 disease at a given location and time (e.g. refs <sup>30,36</sup>).

185

186 The dose expressed in infectious quanta ( $n$ ) inhaled by each of the susceptible persons present  
187 in the space ( $N_{sus}$ ) is then:

188

$$189 \quad n = f_i B c_{avg} D \quad (4)$$

190

191 where  $f_i$  is the penetration efficiency of virus-carrying particles through masks or face coverings  
192 for inhalation (which takes into account the effect of the fraction of occupants wearing face  
193 coverings);  $B$  is the breathing volumetric flow rate of susceptible persons;  $D$  is the duration of



194 exposure, assumed to be the same for all the susceptible persons. Substituting:

195

$$196 \quad n = r_{ss} E_p f_e f_i B D / (V \lambda) \quad (5)$$

197

198 The number of expected secondary infections increases monotonically with increasing  $n$ . For an

199 individual susceptible person, by definition of an infectious quantum, the probability of infection

200 is <sup>28</sup>:

201

$$202 \quad P = 1 - e^{-n} \quad (6)$$

203

204 For low values of  $n$ , the use of the Taylor expansion for an exponential allows approximating  $P$

205 as:

206

$$207 \quad P \sim n \quad (7)$$

208

209 The total number of secondary infections expected, which may also be regarded as the effective

210 reproduction number ( $R_e$ ) in a given situation, is then:

211

$$212 \quad N_{si} = P N_{sus} \sim n N_{sus} \quad (8)$$

213

214 where  $N_{sus}$  is the number of susceptible individuals present, which may be lower than the

215 number of occupants due to vaccination or immunity due to past infection. All the outbreaks

216 studied here occurred before COVID-19 vaccines became available. Thus, the number of

217 secondary infections increases linearly with  $n$  at lower values, and non-linearly at higher values.

218 We retain the simplified form to define and calculate the risk parameters, but use equation (6)

219 for fitting the outbreak results in Figure 1b below.

220

## 221 Risk parameters for airborne infection

222

223 We define the relative risk parameter,  $H_r$ , and the risk parameter,  $H$ , for airborne infection in a  
224 shared space. The purpose of  $H_r$  and  $H$  is to capture the dependency of  $P$  and  $N_{si}$ , respectively,  
225 on the parameters that define an event in a given space, in particular those parameters that can  
226 be controlled to reduce risk of shared-room airborne transmission. To better capture the  
227 controllable actions,  $E_p$  and  $B$  were split into factors that can and cannot be controlled.  $E_p$  can  
228 be expressed as the product  $E_{p0} \times r_E$  where  $E_{p0}$  and  $r_E$  are, respectively, the quanta shedding  
229 rate of an infectious person resting and only orally breathing (no vocalization); and the shedding  
230 rate enhancement factor relative to  $E_{p0}$  for an activity with a certain degree of vocalization and  
231 physical intensity (see Table S2a for detail).  $B$  can be expressed as  $B_0 \times r_B$ , where  $B_0$  and  $r_B$  are  
232 the volumetric breathing rate of a sedentary susceptible person in the age group of 41-<51  
233 years (numerically also the average for all age groups) and the relative breathing rate  
234 enhancement factor (vs.  $B_0$ ) for an activity with a certain physical intensity and for a certain age  
235 group (see Table S2b for detail).  $E_{p0}$  is uncertain, likely highly variable across the population,  
236 and variable over time during the period of infectiousness.<sup>31,35,37</sup> It may also increase due to new  
237 virus variants such as the SARS-CoV-2 Delta variant, that is more contagious, assuming that  
238 the increased contagiousness is due to increased viral emission or reduced infectious dose  
239 (both of which would increase the quanta emission rate).<sup>38,39</sup> We note that some variants could  
240 in principle also increase transmissibility by lengthening the period of infectiousness for a given  
241 person, which by itself would not increase the quanta emission rate in a given situation.  $B_0$  is  
242 relatively well known, and varies with a susceptible person's age, sex, and body weight, in  
243 addition to physical activity level.  $r_E$  and  $r_B$  are less uncertain than  $E_{p0}$  and are functions of the  
244 specific physical and vocalization activities.<sup>31,35,40</sup> Thus, they are useful in capturing the  
245 quantitative impact of specific controllable factors. There could be factors beyond those

246 considered here that lead to variation of viral emissions, such as the respiratory effort of patients  
247 with breathing disorders, such as emphysema or asthma.<sup>41</sup> Such factors can be incorporated  
248 into updated Tables in the future.

249

250 Then P can be expressed as a function of  $E_{p0}$ ,  $B_0$  and the product of the other controllable  
251 factors as:

252

$$253 \quad P = 1 - \exp(-E_{p0} B_0 H_r) \sim E_{p0} B_0 H_r \quad (9)$$

254

255 Where  $H_r$  is the relative risk parameter:

256

$$257 \quad H_r = r_{ss} r_E r_B f_e f_i D / (V \lambda) \quad (10)$$

258

259

260 It has a unit of  $h^2 m^{-3}$ , which indicates the increase of risk with duration (h), the inverse of the  
261 ventilation rate expressed as air changes per hour ( $1/h^{-1} = h$ ), and the inverse of the volume of  
262 the space ( $1/m^3$ ). The other parameters such as the effect of masking are dimensionless.  $H_r$   
263 includes the relative increase of the emission with activity ( $r_E$ ), but not the quanta emission rate  
264 by a resting and orally breathing infector ( $E_{p0}$ ). This allows using the same risk parameters for  
265 different diseases, which will naturally separate in the graphs according to their transmissibility.  
266 The four terms that make up  $\lambda$  may vary in relative importance for different diseases and  
267 conditions.  $\lambda_{dec} \sim 1.1 h^{-1}$ <sup>42</sup> has been reported for COVID-19.  $\lambda_{dec}$  depends on temperature and  
268 relative humidity.<sup>43,44</sup>  $\lambda_{dep}$  depends on particle size and the geometry and airflow in a given  
269 space. Respiratory particle sizes in the range from 1-5  $\mu m$  are thought to play a role in aerosol  
270 transmission of COVID-19, due to a combination of high emission rates by activities such as  
271 talking<sup>45</sup> and low deposition rates.  $\lambda_{dep}$  for a typical furnished indoor space span 0.2-2  $h^{-1}$  over  
272 this size range, with faster deposition for larger particles.<sup>46</sup>  $\lambda_0$  varies from  $\sim 12 h^{-1}$  for airborne  
273 infection isolation rooms,<sup>47</sup>  $\sim 6 h^{-1}$  for laboratories,  $\sim 0.5 h^{-1}$  for residences,<sup>48</sup> and  $\sim 1 h^{-1}$  for  
274 offices.<sup>1,49</sup> Very little ventilation data is available for many semi-public spaces such as shops,

275 restaurants and bars or transportation.  $\lambda_{cle}$  can vary from 0, if such systems are not in use, to  
276 several  $h^{-1}$  for adequately sized systems. Ventilation with clean outdoor air will be important in  
277 most situations, while virus decay and deposition likely contribute but are more uncertain for  
278 COVID-19, based on current information. In particular, the size distribution of aerosols  
279 containing infectious viruses is uncertain.

280

281 We consider a worst-case scenario where rates of deposition and infectivity decay are small  
282 compared with ventilation and air cleaning and can therefore be neglected. This also allows  
283 using the same relative risk parameter to compare different airborne diseases. This yields:

284

$$285 \quad H_r = r_{ss} r_E r_B f_e f_i D / (V (\lambda_0 + \lambda_{cle})) \quad (11)$$

286

287  $H_r$  can be recast as:

288

$$289 \quad H_r = r_{ss} r_E r_B f_e f_i D / (L N_{sus}) \quad (12)$$

290

291

292 where:

293

$$294 \quad L = V (\lambda_0 + \lambda_{cle}) / N_{sus} \quad (13)$$

295

296 Assuming that all of the people present in a space are susceptible to infection,  $L$  is equivalent to  
297 the ventilation plus air cleaning rate per person present in the space, (typically expressed in  
298 liters  $s^{-1}$  person $^{-1}$  in standards and guidelines such as from refs <sup>50–52</sup>. If some fraction of the  
299 people present are immune to the disease, then  $L$  is larger than the corresponding personal  
300 ventilation rate in the guidance. While this recasting will be useful to persons familiar with  
301 ventilation guidelines, we keep the form in equation (11) for most further analyses, since the

302 number of people allowed in a space is one of the critical variables that can be examined with  
303 this relative risk parameter.

304

305 We insert equation (9) into equation (8) and obtain

306

$$307 \quad N_{si} = N_{sus} [1 - \exp(-E_{p0} B_0 H_r)] \sim N_{sus} E_{p0} B_0 H_r = E_{p0} B_0 H \quad (14)$$

308

309 where we define the risk parameter

310

$$311 \quad H = N_{sus} H_r = r_{ss} r_E r_B f_e f_i D N_{sus} / (V (\lambda_0 + \lambda_{cle})) = r_{ss} r_E r_B f_e f_i D / L \quad (15)$$

312

313 When there is only one infector present and  $n$  is small,  $H$  is proportional to  $N_{si}$ , i.e., the outbreak  
314 size. When it is unknown whether an infector is present,  $H$  is an approximate indicator of the  
315 absolute probability of infection ( $P_a$ ), since the expected value of number of infectors ( $N_i$ ) is the  
316 product of number of occupants ( $N$ ) and probability of an occupant being infectious, a measure  
317 of prevalence of infectious people in local population ( $\eta_i$ ), as shown below:

318

$$319 \quad P_a \sim N_i r_{ss} E_p f_e f_i B D / (V \lambda) = \eta_i N r_{ss} E_{p0} B_0 r_E r_B f_e f_i D / (V \lambda)$$

$$320 \quad \sim \eta_i N_{sus} H_r E_{p0} B_0 = \eta_i E_{p0} B_0 H \quad (16)$$

321

322 The precise estimation of  $\eta_i$  is complex for several reasons. Most transmission may be  
323 associated with those infected with high viral loads,<sup>53,54</sup> as many infected people may not shed  
324 virus into the air.<sup>37</sup> Also much spread is by people with few or no symptoms who may not know  
325 that they are infected,<sup>55</sup> however a fraction of symptomatic infectious people are typically in  
326 isolation. There is also significant variation in viral load and infectivity during the course of the

327 disease.<sup>56</sup> For these reasons, it is very difficult to determine  $\eta_i$  precisely based on test data. For  
328 a situation with multiple potential infectors present (e.g., a COVID ward in a hospital), the risk  
329 parameters should be multiplied by the number of infectors.

330

331 For the analysis later in the paper that does not involve activity type or face covering choice  
332 (and thus does not involve  $r_E$ ,  $r_B$ ,  $f_e$ , or  $f_i$ ), we define another parameter ( $H'$ ), which is closely  
333 related to  $H$ :

334

$$335 \quad H' = D N_{\text{sus}} / (V (\lambda_0 + \lambda_{\text{cle}})) = r_{\text{ss}} D / L \quad (17)$$

336

337 This parameter only captures the characteristics of susceptible people's presence in the indoor  
338 space, not of their behavior.

339

#### 340 **Value of the risk parameters for documented outbreaks of COVID-19**

341

342 An important advantage of the simple risk parameters is that their values can be calculated for  
343 outbreaks that are documented in the scientific literature. Values for documented COVID-19  
344 outbreaks are shown in Table 1 ( $r_E$  and  $r_B$  are estimated based on the likely types of activities in  
345 each case,<sup>31,35,40</sup> see Table S2 for typical values). Also included are values for outbreaks  
346 documented in the literature for tuberculosis and measles, which are widely accepted to  
347 transmit through the air, and an influenza outbreak that was clearly due to airborne  
348 transmission. We have included all the outbreaks known to us for which sufficient information  
349 was available to estimate airborne infection risk. Most public health investigations so far in this  
350 pandemic have neglected to report ventilation rates, the volume of the space, filter and air  
351 cleaner efficiencies, and other building science details, and thus their airborne risk cannot be  
352 estimated. It is important that future outbreak reports include this information, to allow

353 expanding our knowledge of the circumstances conducive to airborne transmission of different  
 354 diseases.  
 355

| Disease  | Outbreak (reference)                                                  | $r_E$<br>Relative shedding rate factor | $r_B$<br>Relative breathing rate factor | D (h) | $N_{sus}$       | V (m <sup>3</sup> ) | $\lambda_0$ (h <sup>-1</sup> ) | L (liter s <sup>-1</sup> person <sup>-1</sup> ) | $r_{ss}$ | H (persons h <sup>2</sup> m <sup>-3</sup> ) | H' (persons h <sup>2</sup> m <sup>-3</sup> ) | $H_r$ (h <sup>2</sup> m <sup>-3</sup> ) | Attack rate (%) | Number of secondary cases |
|----------|-----------------------------------------------------------------------|----------------------------------------|-----------------------------------------|-------|-----------------|---------------------|--------------------------------|-------------------------------------------------|----------|---------------------------------------------|----------------------------------------------|-----------------------------------------|-----------------|---------------------------|
| COVID-19 | Guangzhou restaurant <sup>4</sup>                                     | 9.3 <sup>a</sup>                       | 1                                       | 1.2   | 20              | 97                  | 0.67                           | 0.9                                             | 0.31     | 1.1                                         | 0.11                                         | 0.054                                   | 45              | 9                         |
|          | Big bus outbreak <sup>19</sup> (ventilation from pers. comm. Y. Li)   | 1                                      | 1                                       | 3.3   | 46              | 60                  | 4.7                            | 1.7                                             | 0.94     | 0.50                                        | 0.50                                         | 0.011                                   | 17              | 8                         |
|          | Small bus outbreak <sup>19</sup> (ventilation from pers. comm. Y. Li) | 1                                      | 1                                       | 1     | 17              | 22                  | 8.9                            | 3.2                                             | 0.89     | 0.077                                       | 0.077                                        | 0.0045                                  | 12              | 2                         |
|          | Skagit Choir <sup>11</sup>                                            | 85 <sup>b</sup>                        | 2.5 <sup>c</sup>                        | 2.5   | 60              | 810                 | 0.7                            | 2.6                                             | 0.53     | 30                                          | 0.14                                         | 0.5                                     | 87              | 53                        |
|          | Call center <sup>57</sup>                                             | 30 <sup>d</sup>                        | 1                                       | 8     | 216             | 630                 | 6                              | 4.9                                             | 0.98     | 13                                          | 0.45                                         | 0.062                                   | 44              | 94                        |
|          | Aircraft <sup>58</sup>                                                | 50 <sup>e</sup>                        | 1                                       | 11    | 19 <sup>f</sup> | 60                  | 21                             | 18                                              | 1        | 8.4                                         | 0.17                                         | 0.44                                    | 63              | 12                        |
|          | Slaughterhouse <sup>59</sup>                                          | 4.3 <sup>g</sup>                       | 5 <sup>h</sup>                          | 8     |                 | 3000                | 0.53                           |                                                 | 0.77     |                                             |                                              | 0.083                                   | 26              |                           |
|          | Berlin Choir <sup>60</sup>                                            | 85 <sup>b</sup>                        | 2.5 <sup>c</sup>                        | 2.5   |                 | 1200                | 0.17                           |                                                 | 0.19     |                                             |                                              | 0.49                                    | 91              |                           |

|              |                                  |                  |                  |      |    |     |     |                           |                |       |       |         |    |    |
|--------------|----------------------------------|------------------|------------------|------|----|-----|-----|---------------------------|----------------|-------|-------|---------|----|----|
|              | Berlin School <sup>160</sup>     | 1                | 1                | 4.5  |    | 180 | 8.3 |                           | 0.97           |       |       | 0.0029  | 10 |    |
|              | Berlin School <sup>260</sup>     | 1                | 1                | 1.5  |    | 150 | 10  |                           | 0.93           |       |       | 0.00093 | 6  |    |
|              | Israel School <sup>61</sup>      | 5.7 <sup>i</sup> | 1.1 <sup>j</sup> | 4.5  |    | 150 | 2.7 |                           | 0.92           |       |       | 0.1     | 43 |    |
|              | Germany Meeting <sup>60</sup>    | 1.7 <sup>k</sup> | 1                | 2    |    | 170 | 1.2 |                           | 0.62           |       |       | 0.012   | 17 |    |
| Tuberculosis | Office <sup>62</sup>             | 1.7 <sup>k</sup> | 1                | 160  | 67 |     |     | 7.1                       | 1 <sup>l</sup> | 11    | 6.3   | 0.16    | 40 | 27 |
|              | Hospital <sup>63</sup>           | 1.9 <sup>m</sup> | 1.7 <sup>n</sup> | 1800 | 25 | 200 | 6   | 13                        | 1 <sup>l</sup> | 120   | 37.5  | 4.8     | 28 | 7  |
| Influenza    | Aircraft <sup>e 64</sup>         | 50               | 1                | 4.3  | 29 | 168 | 0.5 | 0.45                      | 0.59           | 44    | 0.88  | 1.5     | 86 | 25 |
| Measles      | School <sup>28</sup>             | 1                | 1                | 10   | 48 |     |     | 150 <sup>o</sup><br>(7.6) | 1 <sup>l</sup> | 0.019 | 0.019 | 0.0004  | 52 | 25 |
|              | School <sup>p 28</sup>           | 1                | 1                | 30   | 31 |     |     | 170 <sup>o</sup><br>(5.5) | 1 <sup>l</sup> | 0.05  | 0.05  | 0.0016  | 23 | 7  |
|              | Physician's Office <sup>65</sup> | 1                | 1                | 1    | 12 | 250 | 1.2 | 6.9                       | 0.42           | 0.017 | 0.017 | 0.0014  | 33 | 4  |

356

357 Footnotes: choice of parameters for specific cases. <sup>a</sup> Talking during half of the time and half normal / half loud talking

358 assumed; <sup>b</sup> Light exercise - loudly speaking; <sup>c</sup> Light intensity for 61-<71 years; <sup>d</sup> Resting - loudly speaking; <sup>e</sup> Estimate

359 for coughing. The value is the product of  $r_E$  for resting - speaking and the ratio of the average expired aerosol counts

360 for coughing and talking;<sup>66</sup> <sup>f</sup> only the business class cabin is considered; <sup>g</sup> Moderate exercise - oral breathing; <sup>h</sup>

361 Moderate intensity for all age groups; <sup>i</sup> Standing - speaking for the infectious teacher; <sup>j</sup> Sedentary/passive for students

362 aged 12-18; <sup>k</sup> Resting - speaking during  $\frac{1}{3}$  of the time assumed; <sup>l</sup> Event long enough for the assumption of unity for

363  $r_{ss}$ ; <sup>m</sup> Half resting - oral breathing / half light exercise -oral breathing assumed; <sup>n</sup> Half sedentary/passive / half light

364 intensity assumed; <sup>o</sup> Ventilation rate per susceptible person. The number in parentheses is for the ventilation rate per



365 occupant, estimated based on a teacher-to-student ratio of 11.3% for Monroe County, NY (according to National  
366 Center for Education Statistics Common Core of Data (<https://nces.ed.gov/ccd/>));<sup>p</sup> Scaled to the single-infectior  
367 condition.

368

369 *Table 1: Parameters for outbreaks documented in the literature. Missing parameters could not*  
370 *be calculated from the information given in the literature references.*

371

372 We see that the COVID-19 outbreaks that have been documented span ~2.5 orders of  
373 magnitude range of the risk parameter  $H \sim 0.09\text{-}30$  persons  $\text{h}^2 \text{m}^{-3}$ . Numbers of secondary  
374 cases of these outbreaks generally increase with  $H$  (Figure 1a). Aiming to maintain values far  
375 below the threshold of  $0.05$  persons  $\text{h}^2 \text{m}^{-3}$  should help reduce outbreaks.

376

377  $H_r$  correlates well with the attack rates for the outbreaks reported in Table 1 (Figure 1b,  $H_r$  can  
378 be calculated for more literature outbreaks than  $H$ ). COVID-19 outbreaks are observed for  $H_r >$   
379  $0.001$   $\text{h}^2 \text{m}^{-3}$ , and thus indoor activities should be limited to conditions below this value during  
380 the pandemic whenever possible.

381

382 A trend line can be fitted to the attack rate vs.  $H_r$  dataset with the Box/Wells-Riley model (Figure  
383 1b), with the fitting parameter being  $E_{p0}$ , i.e. the basic quanta shedding rate (when breathing  
384 only, no vocalization). A best-fit  $E_{p0}$  of  $18.6$  quanta  $\text{h}^{-1}$  was obtained (with  $B_0 = 0.288 \text{ m}^3 \text{ h}^{-1}$   
385 assumed for all occupants for simplicity). When the uncertainties of  $H_r$  and attack rates are  
386 considered, the uncertainty of  $E_{p0}$  can also be estimated through Monte Carlo uncertainty  
387 propagation, described in detail in Section S2. The 5<sup>th</sup> and 95<sup>th</sup> percentiles of the  $E_{p0}$  values are  
388  $8.7$  and  $45.4$  quanta  $\text{h}^{-1}$ , respectively. This range is higher than that suggested by Buonanno et  
389 al. ( $2$  quanta  $\text{h}^{-1}$ ),<sup>31,35</sup> but overlapping with the uncertainty range provided by those authors. Note  
390 that outbreaks are typically only observed for individuals with higher quanta emission rates;

391 many infected individuals have low emission rates and the risk in those situations will be lower  
392 than estimated here.<sup>31,35</sup> The attack rates estimated according to this trend line have a high  
393 correlation with the actual attack rates ( $r^2 = 0.90$ ; Figure S1). Given the small size of the dataset  
394 of  $H_r$  and attack rates, we cross-validate this fitting by the leave-one-out method.<sup>67</sup> The 12  
395 values of  $E_{p0}$  obtained in the cross validation have maximum and mean relative absolute  
396 deviations of 20% and 6%, respectively, from the best-fit value, showing the robustness of the  
397 fitting.

398

399 Close alignment supports the dominant shared-room airborne character of these COVID-19  
400 outbreaks. If the outbreaks had major components of other transmission modes (e.g., fomite or  
401 close-range transmission), we would expect a dependence on other parameters not considered  
402 here and overall much lower correlation with the risk parameters. Nevertheless, it can be  
403 observed that the attack rates of the outbreaks at low  $H_r$  ( $\sim 0.01 \text{ h}^2 \text{ m}^{-3}$  or lower) are higher than  
404 the fitted curve. This can be due to several factors, including i) other transmission routes (e.g.,  
405 short-range airborne transmission, for which the risk cannot be well captured by the model in  
406 this study and can still be significant at low  $H_r$ ) or ii) the detection of only outlier cases of long-  
407 range airborne transmission resulting from the variability of  $E_{p0}$  (e.g., cases where the infector's  
408 actual quanta emission rate was extremely high), as the other cases may have too few  
409 secondary infections to be documented in the literature.

410

411 (a)

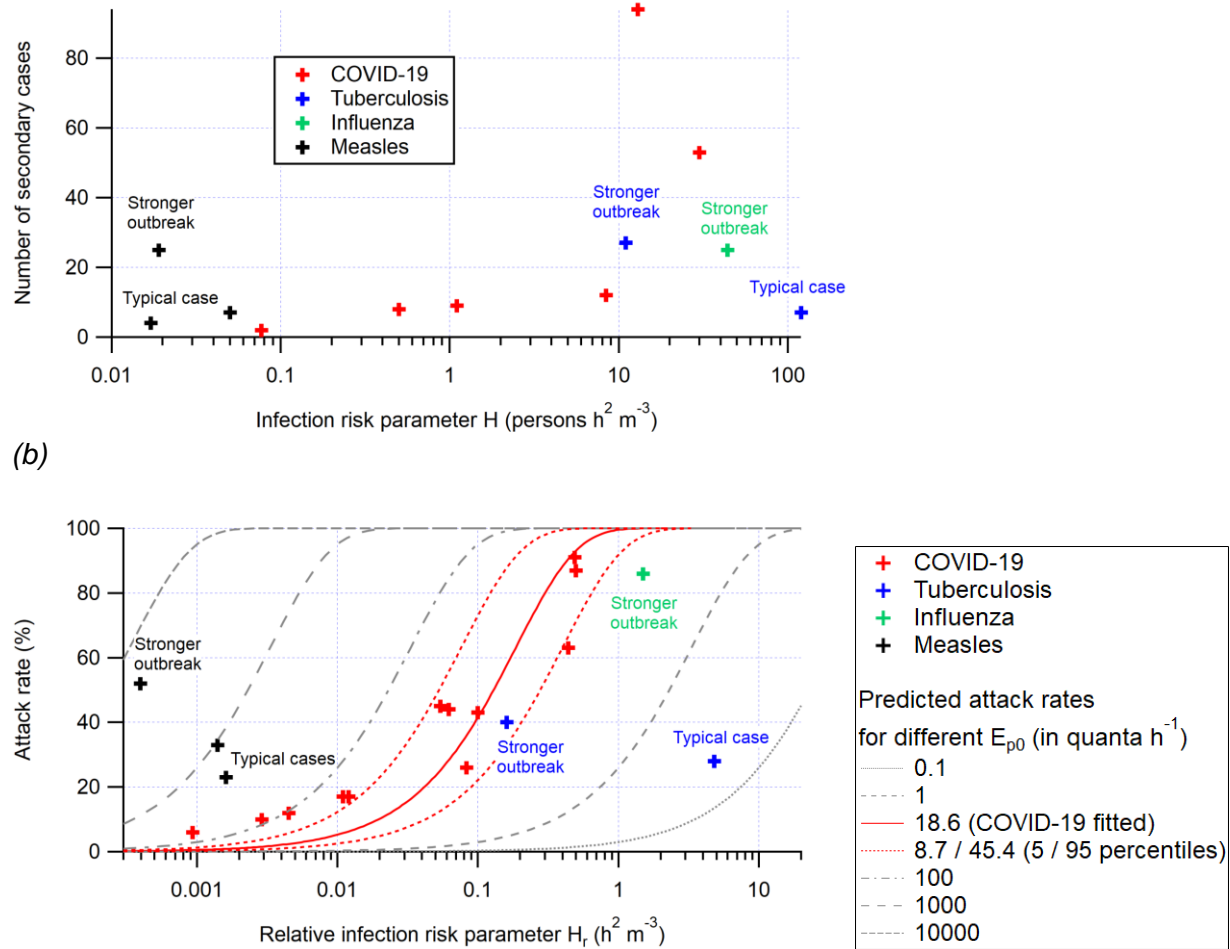

412  
413 (b)

414  
415 *Figure 1: (a) Number of secondary cases vs. the risk parameter  $H$  and (b) attack rate vs. the*  
416 *relative risk parameter  $H_r$  for outbreaks of COVID-19, tuberculosis, influenza, and measles*  
417 *reported in the literature. The fitted trend line of attack rate as a function of  $H_r$  and its estimated*  
418 *uncertainty range (5<sup>th</sup> and 95<sup>th</sup> percentiles) are also shown in (b). All of the outbreaks*  
419 *investigated here involve the original variants of the virus. A variant twice as contagious should*  
420 *result in moving the results to the left by a factor of two or so.*

421  
422 **Effect of building parameters vs. human activities**

423  
424 The type of activity performed in each case (captured by the product of  $r_E$  and  $r_B$ ) contributes  
425 substantially to the difference in  $H$  between these cases. When human activities are not taken

426 into account, the parameter  $H'$  only spans a narrow range of 0.09-0.56 person  $\text{h}^2 \text{m}^{-3}$ . This is  
427 probably due to similar per-person ventilation rates in many public indoor spaces (on the order  
428 of a few liter  $\text{s}^{-1} \text{person}^{-1}$ )<sup>50</sup> and similar lengths of common events (in hours).

429

430 Similar to  $H$ , the variation in the values of  $H_r$  for the outbreaks in Table 1 is also largely  
431 determined by  $r_E$  and  $r_B$ . If they are not taken into account,  $H_r$  for all outbreaks would vary in the  
432 narrow range 0.001 to  $\sim 0.01 \text{h}^2 \text{m}^{-3}$ , as  $V$  and  $\lambda_0$  are building characteristics and  $D$ , as discussed  
433 above, is usually in hours. This implies that, in the presence of a single infector, reducing  
434 vocalization and/or physical intensity levels of the indoor activity is a very effective way to lower  
435 the infection risk of susceptible individuals. Reducing event length can also help, while reducing  
436 occupancy cannot in this case, as shown by equation (10).

437

438 It is possible that some of the most visible outbreaks are associated with super-emitter  
439 individuals, who shed virus particles at higher rates than others.<sup>41,68-70</sup> If that is the case, the  
440 actual  $H_r$  values at which significant transmission starts to appear in the presence of individuals  
441 that are not super emitters may be higher than those determined here. However, if super-  
442 emitters are important, so will be their contribution to total spread, and thus one should try to  
443 reduce the risk to reduce the probability of such events occurring.

444

#### 445 **Values of the risk parameters for outbreaks of other airborne diseases**

446

447 In Table 1 and Figure 1 we also include a few reported indoor outbreaks of three other diseases  
448 with significant airborne transmission, i.e., tuberculosis, influenza, and measles. For outbreaks  
449 to have a similar number of secondary cases or attack rate,  $H$  or  $H_r$  needs to be higher for  
450 tuberculosis and influenza and lower for measles than that for COVID-19 (Figure 1). Note that  
451 many of the children present in the measles outbreak were vaccinated, but the risk parameter

452 framework can still be applied by considering the number of susceptible children present. This  
453 difference is mainly due to differences in  $E_{p0}$  (lower for tuberculosis and influenza and higher for  
454 measles; Figure 1b). A higher  $E_{p0}$  for measles may indicate a larger amount of airborne measles  
455 virus in breath or a steeper dose-response curve for the measles virus than SARS-CoV-2, or  
456 both. A novel disease as contagious as measles would make almost any indoor situation prone  
457 to superspreading. On the other hand, tuberculosis and influenza are less contagious.  
458 Tuberculosis transmission is propagated because untreated infected people remain contagious  
459 for years.<sup>71</sup> The influenza outbreak occurred in an airplane without ventilation with the index  
460 case constantly coughing, and represents an extreme for this disease.<sup>64</sup> Most influenza patients  
461 emit significantly less virus.<sup>72</sup> More discussions about quanta emission rates of different  
462 diseases can be found in refs <sup>35,73</sup>.

463  
464 Given that both the measles and tuberculosis pathogens are widely accepted as airborne, the  
465 intermediate risk profile for COVID-19 in Figure 1b is not inconsistent with airborne  
466 transmission, contrary to frequently made arguments.<sup>74,75</sup> Contagiousness of a disease does not  
467 necessarily indicate the transmission route.<sup>76</sup> Airborne diseases can vary in their  
468 contagiousness depending on parameters such as the amount of virus shed, the survival of the  
469 virus in the air, the dose-response relationship for infection, and other parameters. The only  
470 fundamental requirement is that transmission needs to be sufficient for the disease to survive as  
471 such, something COVID-19 has had no trouble with so far.

472

### 473 **Graphical representation of relative risks of different situations**

474

475 When it is not known whether infectors are present at an indoor event, all occupants must be  
476 considered possible infectors. We assume that the probability of an occupant being infectious is  
477 the same as the fraction of infectious people in the local population ( $\eta_I$ ).  $H$  indicates the risk of

478 an outbreak. Consequently, the risk also depends on the number of occupants in addition to  
479 vocalization level, event duration, ventilation, and mask wearing. Jones et al.<sup>25</sup> estimated the  
480 dependency of the infection risk on these factors and tabulated it in a manner similar to Table 2.  
481 However, they only did so qualitatively. Having defined  $H$  as a risk parameter, we can assess  
482 the risk more quantitatively based on  $H$  values (as well as contact times allowed until outbreak  
483 risk is significant ( $H = 0.05$  persons  $h^2 m^{-3}$ ) and attack rates) under different conditions (Table 2).  
484 Although the actual risk also depends on  $\eta_1$  and the choice of the threshold for high risk (red  
485 cells in Table 2) is subjective, the risk parameter ( $H$  value) in Table 2 seems to vary in a smaller  
486 range than the corresponding table in Jones et al..<sup>25</sup> We also show that being outdoors (with  
487 much better ventilation than indoors) has a greater expected benefit than they estimated.

488

489 (a) Risk parameter  $H$  (persons  $h^2 m^{-3}$ )

| Type and level of group activity                | Low occupancy               |                            |                   | High occupancy              |                            |                   |
|-------------------------------------------------|-----------------------------|----------------------------|-------------------|-----------------------------|----------------------------|-------------------|
|                                                 | Outdoor and well ventilated | Indoor and well ventilated | Poorly ventilated | Outdoor and well ventilated | Indoor and well ventilated | Poorly ventilated |
| Wear face coverings, contact for short time     |                             |                            |                   |                             |                            |                   |
| Silent                                          | 2.33E-05                    | 1.17E-03                   | 1.17E-02          | 2.33E-04                    | 1.17E-02                   | 1.17E-01          |
| Speaking                                        | 1.17E-04                    | 5.83E-03                   | 5.83E-02          | 1.17E-03                    | 5.83E-02                   | 5.83E-01          |
| Shouting, singing                               | 7.00E-04                    | 3.50E-02                   | 3.50E-01          | 7.00E-03                    | 3.50E-01                   | 3.50E+00          |
| Heavy exercise                                  | 1.63E-03                    | 8.17E-02                   | 8.17E-01          | 1.63E-02                    | 8.17E-01                   | 8.17E+00          |
| Wear face coverings, contact for prolonged time |                             |                            |                   |                             |                            |                   |
| Silent                                          | 2.33E-04                    | 1.17E-02                   | 1.17E-01          | 2.33E-03                    | 1.17E-01                   | 1.17E+00          |
| Speaking                                        | 1.17E-03                    | 5.83E-02                   | 5.83E-01          | 1.17E-02                    | 5.83E-01                   | 5.83E+00          |
| Shouting, singing                               | 7.00E-03                    | 3.50E-01                   | 3.50E+00          | 7.00E-02                    | 3.50E+00                   | 3.50E+01          |
| Heavy exercise                                  | 1.63E-02                    | 8.17E-01                   | 8.17E+00          | 1.63E-01                    | 8.17E+00                   | 8.17E+01          |
| No face coverings, contact for short time       |                             |                            |                   |                             |                            |                   |
| Silent                                          | 6.67E-05                    | 3.33E-03                   | 3.33E-02          | 6.67E-04                    | 3.33E-02                   | 3.33E-01          |
| Speaking                                        | 3.33E-04                    | 1.67E-02                   | 1.67E-01          | 3.33E-03                    | 1.67E-01                   | 1.67E+00          |
| Shouting, singing                               | 2.00E-03                    | 1.00E-01                   | 1.00E+00          | 2.00E-02                    | 1.00E+00                   | 1.00E+01          |
| Heavy exercise                                  | 4.67E-03                    | 2.33E-01                   | 2.33E+00          | 4.67E-02                    | 2.33E+00                   | 2.33E+01          |
| No face coverings, contact for prolonged time   |                             |                            |                   |                             |                            |                   |
| Silent                                          | 6.67E-04                    | 3.33E-02                   | 3.33E-01          | 6.67E-03                    | 3.33E-01                   | 3.33E+00          |
| Speaking                                        | 3.33E-03                    | 1.67E-01                   | 1.67E+00          | 3.33E-02                    | 1.67E+00                   | 1.67E+01          |
| Shouting, singing                               | 2.00E-02                    | 1.00E+00                   | 1.00E+01          | 2.00E-01                    | 1.00E+01                   | 1.00E+02          |
| Heavy exercise                                  | 4.67E-02                    | 2.33E+00                   | 2.33E+01          | 4.67E-01                    | 2.33E+01                   | 2.33E+02          |

490

491

492

493

494 (b) Exposure time (in h) corresponding to an infection risk parameter (H) value of 0.05 person h<sup>2</sup>

495 m<sup>-3</sup>

| Type and level of group activity | Low occupancy               |                            |                   | High occupancy              |                            |                   |
|----------------------------------|-----------------------------|----------------------------|-------------------|-----------------------------|----------------------------|-------------------|
|                                  | Outdoor and well ventilated | Indoor and well ventilated | Poorly ventilated | Outdoor and well ventilated | Indoor and well ventilated | Poorly ventilated |
| <b>Wear face coverings</b>       |                             |                            |                   |                             |                            |                   |
| Silent                           | 2142.86                     | 42.86                      | 4.29              | 214.29                      | 4.29                       | 0.43              |
| Speaking                         | 428.57                      | 8.57                       | 0.86              | 42.86                       | 0.86                       | 0.09              |
| Shouting, singing                | 71.43                       | 1.43                       | 0.14              | 7.14                        | 0.14                       | 0.01              |
| Heavy exercise                   | 30.61                       | 0.61                       | 0.06              | 3.06                        | 0.06                       | 0.01              |
| <b>No face coverings</b>         |                             |                            |                   |                             |                            |                   |
| Silent                           | 750.00                      | 15.00                      | 1.50              | 75.00                       | 1.50                       | 0.15              |
| Speaking                         | 150.00                      | 3.00                       | 0.30              | 15.00                       | 0.30                       | 0.03              |
| Shouting, singing                | 25.00                       | 0.50                       | 0.05              | 2.50                        | 0.05                       | 0.01              |
| Heavy exercise                   | 10.71                       | 0.21                       | 0.02              | 1.07                        | 0.02                       | 0.00              |

496

497 (c) Estimated attack rate when 0.1% of the local population are infectious

| Type and level of group activity                       | Low occupancy               |                            |                   | High occupancy              |                            |                   |
|--------------------------------------------------------|-----------------------------|----------------------------|-------------------|-----------------------------|----------------------------|-------------------|
|                                                        | Outdoor and well ventilated | Indoor and well ventilated | Poorly ventilated | Outdoor and well ventilated | Indoor and well ventilated | Poorly ventilated |
| <b>Wear face coverings, contact for short time</b>     |                             |                            |                   |                             |                            |                   |
| Silent                                                 | 0.00%                       | 0.01%                      | 0.06%             | 0.00%                       | 0.06%                      | 0.62%             |
| Speaking                                               | 0.00%                       | 0.03%                      | 0.31%             | 0.01%                       | 0.31%                      | 3.08%             |
| Shouting, singing                                      | 0.00%                       | 0.19%                      | 1.86%             | 0.04%                       | 1.86%                      | 17.10%            |
| Heavy exercise                                         | 0.01%                       | 0.44%                      | 4.28%             | 0.09%                       | 4.28%                      | 35.43%            |
| <b>Wear face coverings, contact for prolonged time</b> |                             |                            |                   |                             |                            |                   |
| Silent                                                 | 0.00%                       | 0.06%                      | 0.62%             | 0.01%                       | 0.62%                      | 6.06%             |
| Speaking                                               | 0.01%                       | 0.31%                      | 3.08%             | 0.06%                       | 3.08%                      | 26.84%            |
| Shouting, singing                                      | 0.04%                       | 1.86%                      | 17.10%            | 0.37%                       | 17.10%                     | 84.66%            |
| Heavy exercise                                         | 0.09%                       | 4.28%                      | 35.43%            | 0.87%                       | 35.43%                     | 98.74%            |
| <b>No face coverings, contact for short time</b>       |                             |                            |                   |                             |                            |                   |
| Silent                                                 | 0.00%                       | 0.02%                      | 0.18%             | 0.00%                       | 0.18%                      | 1.77%             |
| Speaking                                               | 0.00%                       | 0.09%                      | 0.89%             | 0.02%                       | 0.89%                      | 8.54%             |
| Shouting, singing                                      | 0.01%                       | 0.53%                      | 5.22%             | 0.11%                       | 5.22%                      | 41.47%            |
| Heavy exercise                                         | 0.02%                       | 1.24%                      | 11.75%            | 0.25%                       | 11.75%                     | 71.35%            |
| <b>No face coverings, contact for prolonged time</b>   |                             |                            |                   |                             |                            |                   |
| Silent                                                 | 0.00%                       | 0.18%                      | 1.77%             | 0.04%                       | 1.77%                      | 16.35%            |
| Speaking                                               | 0.02%                       | 0.89%                      | 8.54%             | 0.18%                       | 8.54%                      | 59.05%            |
| Shouting, singing                                      | 0.11%                       | 5.22%                      | 41.47%            | 1.07%                       | 41.47%                     | 99.53%            |
| Heavy exercise                                         | 0.25%                       | 11.75%                     | 71.35%            | 2.47%                       | 71.35%                     | 100.00%           |

498

499



500 *Table 2: (a) Values of the airborne infection risk parameter ( $H$ , in persons  $h^2 m^{-3}$ ), (b) exposure*  
501 *times corresponding to  $H = 0.05$  persons  $h^2 m^{-3}$ , and (c) predicted attack rates with 0.1%*  
502 *infectious people in local population in shared spaces under different conditions in the similar*  
503 *format of Fig. 3 of ref 25. An additional type of activity (“heavy exercise”) is included. Table S3*  
504 *details the specific choices of the conditions in Table 2. Note that these specifications can be*  
505 *changed as needed, which is easy to implement in the COVID-19 Aerosol Transmission*  
506 *Estimator (Figure S2). Color of a cell varies (a) with  $H$  value from green (0 persons  $h^2 m^{-3}$ ) via*  
507 *yellow (0.05 persons  $h^2 m^{-3}$ ) to red ( $\geq 0.5$  persons  $h^2 m^{-3}$ ), (b) with exposure time from red (0.1 h)*  
508 *via yellow (1 h) to green (10 h), and (c) with predicted attack rate from green (0) via yellow*  
509 *(0.01%) to red (0.1%). The selection of the colors in Table 2a was based on the following*  
510 *considerations: i) no risk ( $H=0$  persons  $h^2 m^{-3}$ ) for green; ii) no documented outbreaks when*  
511  *$H < 0.05$  persons  $h^2 m^{-3}$  (Figure 1a) (thus 0.05 persons  $h^2 m^{-3}$  for yellow); iii) outbreaks with*  
512 *significant numbers of secondary infections when  $H \geq 0.5$  persons  $h^2 m^{-3}$  (Figure 1a) (thus red).*  
513 *For that in Table 2b, relatively simple numbers are chosen for the thresholds that correspond to*  
514 *the thresholds for  $H$  in Table 2a. As probability of infection is given in Table 2c, its colors are*  
515 *chosen based on the personal risk tolerance of the authors. These tables are available in the*  
516 *online transmission risk estimator, and all of their aspects can be modified depending on*  
517 *specific situations and preferences.*

518

519 Note that, although occupancy has no impact on attack rate if an infector is present, occupancy  
520 affects the risk in two ways when the presence of infector(s) is unknown, i.e., i) the probability of  
521 the presence of an infector in a certain locality and ii) the size (number of secondary cases) of  
522 the outbreak if it occurs. Therefore, lowering occupancy has double benefits.

523

524

525 **Risk evaluation for indoor spaces with pre-pandemic and mitigation scenarios**

526

527 Values of the risk parameter  $H$  for some typical public spaces under pre-pandemic conditions  
528 are tabulated in Table S4 and shown in Figure 2.  $H$  in all pre-pandemic settings is on the order  
529 of 0.05 persons  $\text{h}^2 \text{m}^{-3}$  or higher, implying significant risk of outbreak during the pandemic.

530 Often, ventilation rates may be lower than official guidance due to e.g. malfunction, lack of  
531 maintenance, or attempts to save energy. Substandard ventilation, coupled with poor air  
532 distribution, substantially increases the risk of an outbreak and its size. This is consistent with  
533 observations that indicate that COVID-19 outbreaks are disproportionately observed in poorly-  
534 ventilated environments, which are specifically spaces with little to no added outdoor air or  
535 adequately filtered air.<sup>77</sup> However,  $H$  and  $H_r$  of all of the pre-pandemic spaces are in a regime  
536 highly sensitive to mitigation efforts. Therefore mitigation measures such as increasing  
537 ventilation or air cleaning, reducing voice volume when speaking, reducing occupancy,  
538 shortening duration of occupancy and mask wearing are required to reduce the risk of  
539 transmission in similar settings. With mitigation measures implemented,  $H$  in these settings can  
540 be lowered to the order of 0.01 persons  $\text{h}^2 \text{m}^{-3}$ , low enough to avoid major outbreaks.

541 Particularly, for hospital general examination room, a high-risk setting where there can be  
542 coughing infectors emitting quanta at a high rate, a combination of an improvement of  
543 ventilation rate to  $6 \text{ h}^{-1}$ , application of higher efficiency air filters, a halved duration, and a  
544 requirement of fit-tested N95 respirators can lower the attack rate from ~90% to negligible  
545 (Figure 2c). Use of high-quality masks (e.g., N95/FFP3) is highly effective among the mitigation  
546 measures.

547

548

549

550 (a)

It is made available under a [CC-BY-NC-ND 4.0 International license](https://creativecommons.org/licenses/by-nc-nd/4.0/).

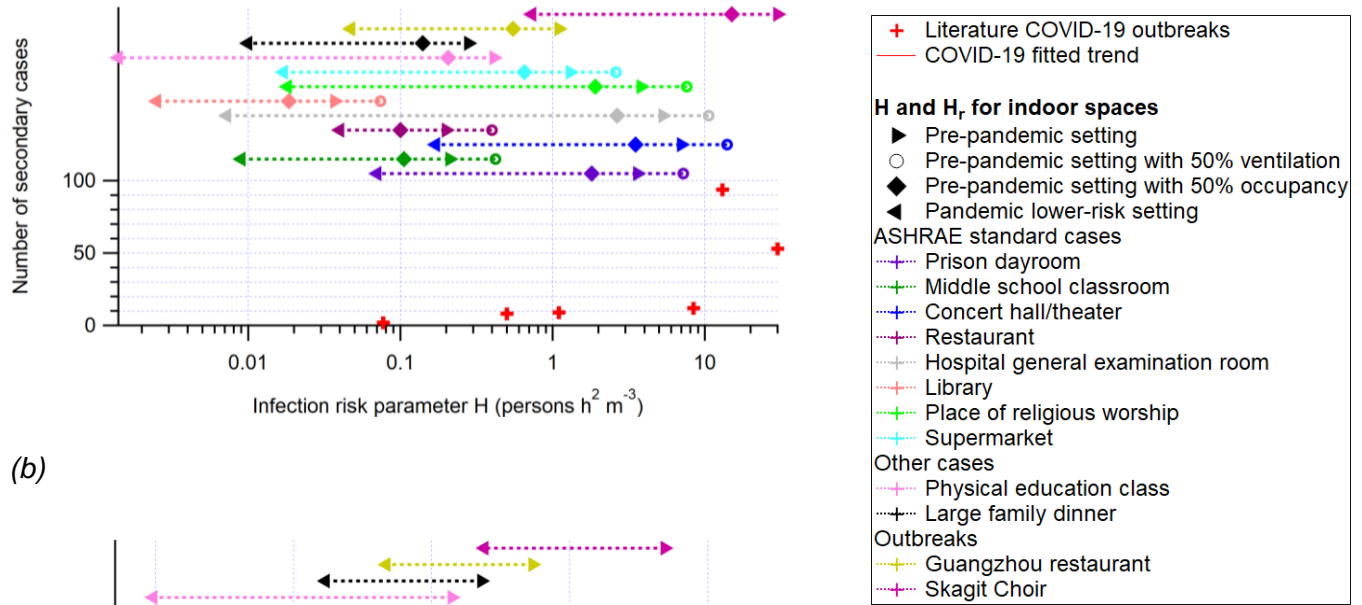

551

552 (b)

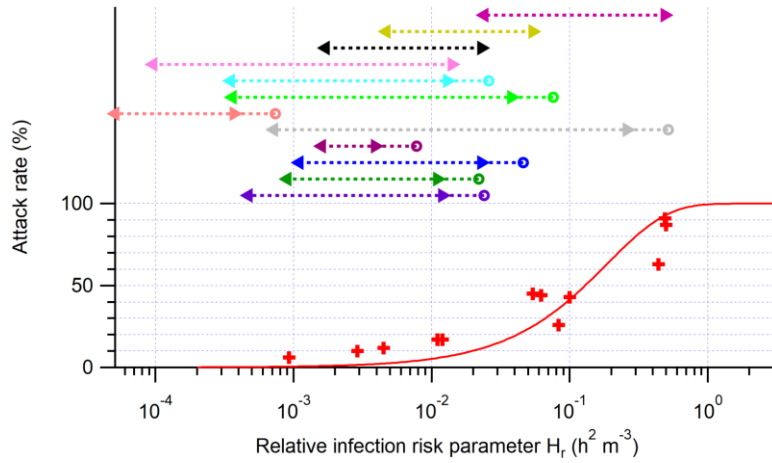

553

554 (c)

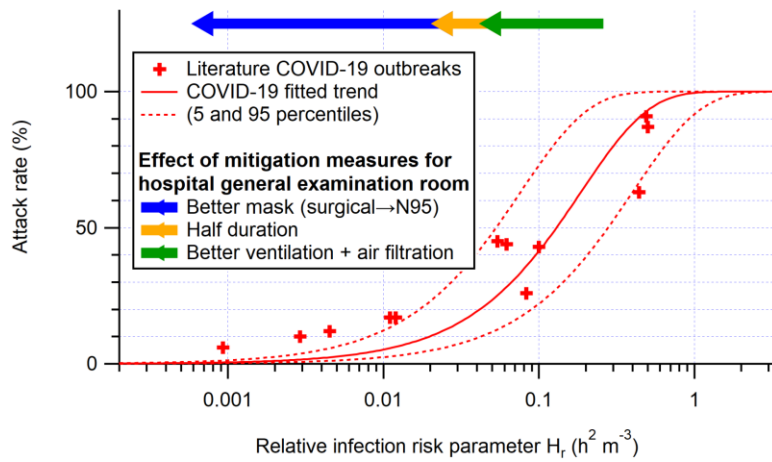

555

556

557 *Figure 2: (a, b) same format as Figure 1, but for COVID-19 only. Also shown are the  $H$  and  $H_r$*   
558 *values for several common indoor situations listed in Table S4. The  $H$  values for the cases with*  
559 *pre-pandemic settings except for a lower occupancy and the  $H$  and  $H_r$  values for the ASHRAE*  
560 *standard cases<sup>50</sup> with pre-pandemic settings except for a lower ventilation rate are shown for*  
561 *comparison. The standalone legend box is for (a) and (b) only. (c) The approximately*  
562 *multiplicative effects of various mitigation measures for the hospital general examination room*  
563 *case are also shown as an example.*

564

### 565 **Calculation of risk parameters for specific situations**

566

567 The calculation of  $H$ ,  $H'$ , and  $H_r$  for specific situations of interest has been implemented in the  
568 COVID-19 aerosol transmission estimator, which is freely available online.<sup>30</sup> The estimator is a  
569 series of spreadsheets that implement the same aerosol transmission model described by Miller  
570 et al.<sup>11</sup> It allows the user to make a copy into an online Google spreadsheet or download it as a  
571 Microsoft Excel file for adaptation to the situations of interest to each user. The model can be  
572 used to estimate the risk of specific situations, to explore the reduction in transmission due to  
573 different control measures (e.g. increased ventilation, masking etc.), and to understand aerosol  
574 transmission modeling for incorporation into more complex models. The model also allows the  
575 estimation of the average  $\text{CO}_2$  concentration during an activity, as an additional indicator of  
576 indoor risk, and to facilitate the investigation of the relationship between infection risk and  $\text{CO}_2$   
577 concentrations.<sup>36,78</sup> A screenshot of the estimator is shown in Figure S2.

578

579 In addition a sheet allows recalculating Table 2 in this paper for sets of parameters different  
580 from those used here (and shown in Table S2).

581

## 582 Discussion

583

584 We have explored the relationship between airborne infection transmission when sharing indoor  
585 spaces and the parameters of the space using a box / Wells-Riley model. We have derived an  
586 expression for the number of secondary infections, and isolated the controllable terms in this  
587 expression in two airborne transmission risk parameters,  $H$  and  $H_r$ .

588

589 We find a consistent relationship, with increasing attack rate in the known COVID-19 outbreaks,  
590 as the value of  $H_r$  increases. This provides some confidence that airborne transmission is  
591 important in these outbreaks, and that the models used here capture the key processes  
592 important for airborne transmission.

593

594 Outbreaks have been observed when  $H_r$  is on the order of  $0.001 \text{ h}^2 \text{ m}^{-3}$  and higher. A criterion  
595 based on  $H_r$  (e.g.  $H_r > 0.01$  or  $0.1 \text{ h}^2 \text{ m}^3$ , depending on available contact tracing resources) can  
596 also be used to determine if an occupant of an indoor space is a “close contact” of an identified  
597 infector in the same space through the shared-room air airborne transmission (note that this  
598 criterion does not apply to close contacts at risk of infection through short-range ( $<2 \text{ m}$ ) airborne  
599 transmission). The lowest  $H$  for the major COVID-19 outbreaks in indoor settings reported in the  
600 literature is  $\sim 0.1 \text{ person h}^2 \text{ m}^{-3}$ . Note that all the outbreaks investigated here concern the early to  
601 mid-2020 variants of SARS-CoV-2, and a variant twice as contagious as those should reduce  
602 the tolerable values of the parameters by about a factor of 2.  $H$  can be orders of magnitude  
603 higher for the superspreading events where most attendees were infected (e.g. the Skagit  
604 Valley choir rehearsal).<sup>11</sup> However, if human activity-dependent factors are not taken into  
605 account,  $H'$  for all the outbreaks discussed in this paper is  $\sim 0.1\text{-}0.5 \text{ person h}^2 \text{ m}^{-3}$ .  $H'$  values for  
606 public indoor spaces usually fall in or near this range primarily due to similar per-person  
607 ventilation rates and public event durations. Substandard ventilation, coupled with poor air

608 distribution, is associated with substantial increases in the risk of outbreak. However, all of the  
609 pre-pandemic example spaces analyzed are in a regime in which they are highly sensitive to  
610 mitigation efforts.

611  
612 The relative risk of COVID-19 infection falls between that of two well-known airborne diseases:  
613 the more transmissible measles and the less transmissible tuberculosis. This shows that the fact  
614 that COVID-19 is less transmissible than measles does not rule out airborne transmission.

615 These risk parameters can be applied to other airborne diseases, if outbreaks are characterized  
616 in this framework. This approach may be useful in the design and renovation of building  
617 systems. For a novel disease that was as transmissible as measles, it would be very difficult to  
618 make any indoor activities safe aside from vaccination.

619  
620 Our analysis shows that mitigation measures to limit aerosol transmission are needed in most  
621 indoor spaces whenever COVID-19 is spreading in a community. Among effective measures are  
622 reducing vocalization, avoiding intense physical activities, shortening duration of occupancy,  
623 reducing number of occupants, wearing high-quality well-fitting masks, increasing ventilation,  
624 improving ventilation effectiveness and applying additional virus removal measures (such as  
625 HEPA filtration and UVGI disinfection). The use of multiple “layers of protection” is needed in  
626 many situations, while a single measure (e.g. masking) may not be able to reduce risk to low  
627 levels. We have shown that combinations of some or all of these measures are able to lower  $H$   
628 close to  $0.01 \text{ person h}^2 \text{ m}^{-3}$ , so that the expected number of secondary cases is substantially  
629 lower than 1 even in the presence of an infectious person, hence would be likely to avoid major  
630 outbreaks.

631

632

633 **Acknowledgements**

634 ZP and JLJ were partially supported by NSF AGS-1822664. TG was supported by ESRC

635 ES/V010069/1.

636

637 **Competing interests**

638 The authors declare no competing interests.

639

640 **References**

- 641 (1) Nazaroff, W. W. Indoor Bioaerosol Dynamics. *Indoor Air* **2016**, *26* (1), 61–78.
- 642 (2) Morawska, L.; Cao, J. Airborne Transmission of SARS-CoV-2: The World Should Face the  
643 Reality. *Environ. Int.* **2020**, *139*, 105730.
- 644 (3) Tellier, R. Review of Aerosol Transmission of Influenza A Virus. *Emerg. Infect. Dis.* **2006**,  
645 *12* (11), 1657–1662.
- 646 (4) Li, Y.; Qian, H.; Hang, J.; Chen, X.; Cheng, P.; Ling, H.; Wang, S.; Liang, P.; Li, J.; Xiao, S.;  
647 Wei, J.; Liu, L.; Cowling, B. J.; Kang, M. Probable Airborne Transmission of SARS-CoV-2 in  
648 a Poorly Ventilated Restaurant. *Build. Environ.* **2021**, *196*, 107788.
- 649 (5) Public Health England. Varicella: The Green Book, Chapter 34. *Immunisation against*  
650 *infectious disease: London, UK* **2015**.
- 651 (6) Tellier, R.; Li, Y.; Cowling, B. J.; Tang, J. W. Recognition of Aerosol Transmission of  
652 Infectious Agents: A Commentary. *BMC Infect. Dis.* **2019**, *19* (1), 101.
- 653 (7) Morawska, L.; Milton, D. K. It Is Time to Address Airborne Transmission of Coronavirus  
654 Disease 2019 (COVID-19). *Clin. Infect. Dis.* **2020**, *71* (9), 2311–2313.
- 655 (8) Lednicky, J. A.; Lauzardo, M.; Fan, Z. H.; Jutla, A.; Tilly, T. B.; Gangwar, M.; Usmani, M.;  
656 Shankar, S. N.; Mohamed, K.; Eiguren-Fernandez, A.; Stephenson, C. J.; Alam, M. M.;  
657 Elbadry, M. A.; Loeb, J. C.; Subramaniam, K.; Waltzek, T. B.; Cherabuddi, K.; Morris, J. G.,  
658 Jr; Wu, C.-Y. Viable SARS-CoV-2 in the Air of a Hospital Room with COVID-19 Patients.  
659 *Int. J. Infect. Dis.* **2020**, *100*, 476–482.
- 660 (9) National Academies of Sciences, Engineering; Medicine; Others. Airborne Transmission of  
661 SARS-CoV-2: Proceedings of a Workshop in Brief. The National Academies Press,  
662 Washington, DC 2020.
- 663 (10) Prather, K. A.; Marr, L. C.; Schooley, R. T.; McDiarmid, M. A.; Wilson, M. E.; Milton, D.  
664 K. Airborne Transmission of SARS-CoV-2. *Science* **2020**, *370* (6514), 303–304.
- 665 (11) Miller, S. L.; Nazaroff, W. W.; Jimenez, J. L.; Boerstra, A.; Buonanno, G.; Dancer, S. J.;  
666 Kurnitski, J.; Marr, L. C.; Morawska, L.; Noakes, C. Transmission of SARS-CoV-2 by  
667 Inhalation of Respiratory Aerosol in the Skagit Valley Chorale Superspreading Event.  
668 *Indoor Air* **2021**, *31* (2), 314–323.
- 669 (12) Greenhalgh, T.; Jimenez, J. L.; Prather, K. A.; Tufekci, Z.; Fisman, D.; Schooley, R. Ten  
670 Scientific Reasons in Support of Airborne Transmission of SARS-CoV-2. *Lancet* **2021**.  
671 [https://doi.org/10.1016/S0140-6736\(21\)00869-2](https://doi.org/10.1016/S0140-6736(21)00869-2).
- 672 (13) Tang, J. W.; Marr, L. C.; Li, Y.; Dancer, S. J. Covid-19 Has Redefined Airborne  
673 Transmission. *BMJ* **2021**, *373*, n913.
- 674 (14) Gelfand, H. M.; Posch, J. The Recent Outbreak of Smallpox in Meschede, West  
675 Germany. *Am. J. Epidemiol.* **1971**, *93* (4), 234–237.



- 676 (15) Yu, I. T. S.; Li, Y.; Wong, T. W.; Tam, W.; Chan, A. T.; Lee, J. H. W.; Leung, D. Y. C.;  
677 Ho, T. Evidence of Airborne Transmission of the Severe Acute Respiratory Syndrome  
678 Virus. *N. Engl. J. Med.* **2004**, *350* (17), 1731–1739.
- 679 (16) Dick, E. C.; Jennings, L. C.; Mink, K. A.; Wartgow, C. D.; Inhorn, S. L. Aerosol  
680 Transmission of Rhinovirus Colds. *J. Infect. Dis.* **1987**, *156* (3), 442–448.
- 681 (17) Chen, W.; Zhang, N.; Wei, J.; Yen, H.-L.; Li, Y. Short-Range Airborne Route Dominates  
682 Exposure of Respiratory Infection during Close Contact. *Build. Environ.* **2020**, *176*  
683 (January), 106859.
- 684 (18) Katelaris, A. L.; Wells, J.; Clark, P.; Norton, S.; Rockett, R.; Arnott, A.; Sintchenko, V.;  
685 Corbett, S.; Bag, S. K. Epidemiologic Evidence for Airborne Transmission of SARS-CoV-2  
686 during Church Singing, Australia, 2020. *Emerg. Infect. Dis.* **2021**, *27* (6).  
687 <https://doi.org/10.3201/eid2706.210465>.
- 688 (19) Shen, Y.; Li, C.; Dong, H.; Wang, Z.; Martinez, L.; Sun, Z.; Handel, A.; Chen, Z.; Chen,  
689 E.; Ebell, M. H.; Wang, F.; Yi, B.; Wang, H.; Wang, X.; Wang, A.; Chen, B.; Qi, Y.; Liang, L.;  
690 Li, Y.; Ling, F.; Chen, J.; Xu, G. Community Outbreak Investigation of SARS-CoV-2  
691 Transmission Among Bus Riders in Eastern China. *JAMA Intern. Med.* **2020**, *180* (12),  
692 1665–1671.
- 693 (20) Kwon, K. S.; Park, J. I.; Park, Y. J.; Jung, D. M.; Ryu, K. W.; Lee, J. H. Evidence of  
694 Long-Distance Droplet Transmission of SARS-CoV-2 by Direct Air Flow in a Restaurant in  
695 Korea. *J. Korean Med. Sci.* **2020**, *35* (46), e415.
- 696 (21) Jang, S.; Han, S. H.; Rhee, J. Y. Cluster of Coronavirus Disease Associated with Fitness  
697 Dance Classes, South Korea. *Emerg. Infect. Dis.* **2020**, *26* (8), 1917–1920.
- 698 (22) Eichler, N.; Thornley, C.; Swadi, T.; Devine, T.; McElnay, C.; Sherwood, J.; Brunton, C.;  
699 Williamson, F.; Freeman, J.; Berger, S.; Ren, X.; Storey, M.; de Ligt, J.; Geoghegan, J. L.  
700 Transmission of Severe Acute Respiratory Syndrome Coronavirus 2 during Border  
701 Quarantine and Air Travel, New Zealand (Aotearoa). *Emerg. Infect. Dis.* **2021**, *27* (5).  
702 <https://doi.org/10.3201/eid2705.210514>.
- 703 (23) Nissen, K.; Krambrich, J.; Akaberi, D.; Hoffman, T.; Ling, J.; Lundkvist, Å.; Svensson, L.;  
704 Salaneck, E. Long-Distance Airborne Dispersal of SARS-CoV-2 in COVID-19 Wards. *Sci.*  
705 *Rep.* **2020**, *10* (1), 19589.
- 706 (24) Hwang, S. E.; Chang, J. H.; Oh, B.; Heo, J. Possible Aerosol Transmission of COVID-19  
707 Associated with an Outbreak in an Apartment in Seoul, South Korea, 2020. *Int. J. Infect.*  
708 *Dis.* **2021**, *104*, 73–76.
- 709 (25) Jones, N. R.; Qureshi, Z. U.; Temple, R. J.; Larwood, J. P. J.; Greenhalgh, T.;  
710 Bourouiba, L. Two Metres or One: What Is the Evidence for Physical Distancing in Covid-  
711 19? *BMJ* **2020**, *370*, m3223.
- 712 (26) Morawska, L.; Tang, J. W.; Bahnfleth, W.; Bluyssen, P. M.; Boerstra, A.; Buonanno, G.;  
713 Cao, J.; Dancer, S.; Floto, A.; Franchimon, F.; Haworth, C.; Hogeling, J.; Isaxon, C.;  
714 Jimenez, J. L.; Kurnitski, J.; Li, Y.; Loomans, M.; Marks, G.; Marr, L. C.; Mazzearella, L.;  
715 Melikov, A. K.; Miller, S.; Milton, D. K.; Nazaroff, W.; Nielsen, P. V.; Noakes, C.; Peccia, J.;  
716 Querol, X.; Sekhar, C.; Seppänen, O.; Tanabe, S.-I.; Tellier, R.; Tham, K. W.; Wargocki, P.;  
717 Wierzbicka, A.; Yao, M. How Can Airborne Transmission of COVID-19 Indoors Be  
718 Minimised? *Environ. Int.* **2020**, *142*, 105832.
- 719 (27) Bond, T. C.; Bosco-Lauth, A.; Farmer, D. K.; Francisco, P. W.; Pierce, J. R.; Fedak, K.  
720 M.; Ham, J. M.; Jathar, S. H.; VandeWoude, S. Quantifying Proximity, Confinement, and  
721 Interventions in Disease Outbreaks: A Decision Support Framework for Air-Transported  
722 Pathogens. *Environ. Sci. Technol.* **2021**, *55* (5), 2890–2898.
- 723 (28) Riley, E. C.; Murphy, G.; Riley, R. L. Airborne Spread of Measles in a Suburban  
724 Elementary School. *Am. J. Epidemiol.* **1978**, *107* (5), 421–432.
- 725 (29) Noakes, C. J.; Sleigh, P. A. Mathematical Models for Assessing the Role of Airflow on  
726 the Risk of Airborne Infection in Hospital Wards. *Journal of The Royal Society Interface.*



2009. <https://doi.org/10.1098/rsif.2009.0305.focus>.
- 728 (30) Jimenez, J. L.; Peng, Z. COVID-19 Aerosol Transmission Estimator  
729 <https://tinyurl.com/covid-estimator> (accessed Mar 26, 2021).
- 730 (31) Buonanno, G.; Morawska, L.; Stabile, L. Quantitative Assessment of the Risk of Airborne  
731 Transmission of SARS-CoV-2 Infection: Prospective and Retrospective Applications.  
732 *Environ. Int.* **2020**, *145*, 106112.
- 733 (32) Lelieveld, J.; Helleis, F.; Borrmann, S.; Cheng, Y.; Drewnick, F.; Haug, G.; Klimach, T.;  
734 Sciare, J.; Su, H.; Pöschl, U. Model Calculations of Aerosol Transmission and Infection  
735 Risk of COVID-19 in Indoor Environments. *Int. J. Environ. Res. Public Health* **2020**, *17* (21),  
736 8114.
- 737 (33) Jones, B.; Sharpe, P.; Iddon, C.; Hathway, E. A.; Noakes, C. J.; Fitzgerald, S. Modelling  
738 Uncertainty in the Relative Risk of Exposure to the SARS-CoV-2 Virus by Airborne Aerosol  
739 Transmission in Well Mixed Indoor Air. *Buuld. Environ.* **2021**, *191*, 107617.
- 740 (34) Han, E.; Tan, M. M. J.; Turk, E.; Sridhar, D.; Leung, G. M.; Shibuya, K.; Asgari, N.; Oh,  
741 J.; García-Basteiro, A. L.; Hanefeld, J.; Cook, A. R.; Hsu, L. Y.; Teo, Y. Y.; Heymann, D.;  
742 Clark, H.; McKee, M.; Legido-Quigley, H. Lessons Learnt from Easing COVID-19  
743 Restrictions: An Analysis of Countries and Regions in Asia Pacific and Europe. *Lancet*  
744 **2020**, *396* (10261), 1525–1534.
- 745 (35) Buonanno, G.; Stabile, L.; Morawska, L. Estimation of Airborne Viral Emission: Quanta  
746 Emission Rate of SARS-CoV-2 for Infection Risk Assessment. *Environ. Int.* **2020**, *141*  
747 (April), 105794.
- 748 (36) Peng, Z.; Jimenez, J. L. Exhaled CO<sub>2</sub> as a COVID-19 Infection Risk Proxy for Different  
749 Indoor Environments and Activities. *Environmental Science & Technology Letters* **2021**.  
750 <https://doi.org/10.1021/acs.estlett.1c00183>.
- 751 (37) Ma, J.; Qi, X.; Chen, H.; Li, X.; Zhang, Z.; Wang, H.; Sun, L.; Zhang, L.; Guo, J.;  
752 Morawska, L.; Grinshpun, S. A.; Biswas, P.; Flagan, R. C.; Yao, M. COVID-19 Patients in  
753 Earlier Stages Exhaled Millions of SARS-CoV-2 per Hour. *Clin. Infect. Dis.* **2020**.  
754 <https://doi.org/10.1093/cid/ciaa1283>.
- 755 (38) Volz, E.; Mishra, S.; Chand, M.; Barrett, J. C.; Johnson, R.; Geidelberg, L.; Hinsley, W.  
756 R.; Laydon, D. J.; Dabrera, G.; O’Toole, Á.; Amato, R.; Ragonnet-Cronin, M.; Harrison, I.;  
757 Jackson, B.; Ariani, C. V.; Boyd, O.; Loman, N. J.; McCrone, J. T.; Gonçalves, S.;  
758 Jorgensen, D.; Myers, R.; Hill, V.; Jackson, D. K.; Gaythorpe, K.; Groves, N.; Sillitoe, J.;  
759 Kwiatkowski, D. P.; COVID-19 Genomics UK (COG-UK) consortium; Flaxman, S.;  
760 Ratmann, O.; Bhatt, S.; Hopkins, S.; Gandy, A.; Rambaut, A.; Ferguson, N. M. Assessing  
761 Transmissibility of SARS-CoV-2 Lineage B.1.1.7 in England. *Nature* **2021**, 1–17.
- 762 (39) Kidd, M.; Richter, A.; Best, A.; Cumley, N.; Mirza, J.; Percival, B.; Mayhew, M.; Megram,  
763 O.; Ashford, F.; White, T.; Moles-Garcia, E.; Crawford, L.; Bosworth, A.; Atabani, S. F.;  
764 Plant, T.; McNally, A. S-Variant SARS-CoV-2 Lineage B1.1.7 Is Associated with  
765 Significantly Higher Viral Loads in Samples Tested by ThermoFisher TaqPath RT-qPCR. *J.*  
766 *Infect. Dis.* **2021**. <https://doi.org/10.1093/infdis/jiab082>.
- 767 (40) EPA. Chapter 6—Inhalation Rates. In *Exposure Factors Handbook*; U.S. Environmental  
768 Protection Agency, 2011.
- 769 (41) Edwards, D. A.; Ausiello, D.; Salzman, J.; Devlin, T.; Langer, R.; Beddingfield, B. J.;  
770 Fears, A. C.; Doyle-Meyers, L. A.; Redmann, R. K.; Killeen, S. Z.; Maness, N. J.; Roy, C. J.  
771 Exhaled Aerosol Increases with COVID-19 Infection, Age, and Obesity. *Proceedings of the*  
772 *National Academy of Sciences* **2021**, *118* (8), e2021830118.
- 773 (42) van Doremalen, N.; Bushmaker, T.; Morris, D. H.; Holbrook, M. G.; Gamble, A.;  
774 Williamson, B. N.; Tamin, A.; Harcourt, J. L.; Thornburg, N. J.; Gerber, S. I.; Lloyd-Smith, J.  
775 O.; de Wit, E.; Munster, V. J. Aerosol and Surface Stability of SARS-CoV-2 as Compared  
776 with SARS-CoV-1. *N. Engl. J. Med.* **2020**, *382* (16), 1564–1567.
- 777 (43) Chan, K. H.; Peiris, J. S. M.; Lam, S. Y.; Poon, L. L. M.; Yuen, K. Y.; Seto, W. H. The

- 778 Effects of Temperature and Relative Humidity on the Viability of the SARS Coronavirus.  
779 *Adv. Virol.* **2011**, 2011, 734690.
- 780 (44) Dabisch, P.; Schuit, M.; Herzog, A.; Beck, K.; Wood, S.; Krause, M.; Miller, D.; Weaver,  
781 W.; Freeburger, D.; Hooper, I.; Green, B.; Williams, G.; Holland, B.; Bohannon, J.; Wahl, V.;  
782 Yolitz, J.; Hevey, M.; Ratnesar-Shumate, S. The Influence of Temperature, Humidity, and  
783 Simulated Sunlight on the Infectivity of SARS-CoV-2 in Aerosols. *Aerosol Sci. Technol.*  
784 **2021**, 55 (2), 142–153.
- 785 (45) Johnson, G. R.; Morawska, L.; Ristovski, Z. D.; Hargreaves, M.; Mengersen, K.; Chao,  
786 C. Y. H.; Wan, M. P.; Li, Y.; Xie, X.; Katoshevski, D.; Corbett, S. Modality of Human Expired  
787 Aerosol Size Distributions. *J. Aerosol Sci.* **2011**, 42 (12), 839–851.
- 788 (46) Thatcher, T. L.; Lai, A. C. K.; Moreno-Jackson, R.; Sextro, R. G.; Nazaroff, W. W. Effects  
789 of Room Furnishings and Air Speed on Particle Deposition Rates Indoors. *Atmos. Environ.*  
790 **2002**, 36 (11), 1811–1819.
- 791 (47) Ninomura, P.; Bartley, J. New Ventilation Guidelines for Health-Care Facilities. *ASHRAE*  
792 *J.* **2001**, 43 (6), 29–33.
- 793 (48) Nazaroff, W. W. Residential Air-Change Rates: A Critical Review. *Indoor Air* **2021**, 31  
794 (2), 282–313.
- 795 (49) Persily, A. K.; Gorfain, J.; Brunner, G. Survey of Ventilation Rates in Office Buildings.  
796 *Build. Res. Inf.* **2006**, 34 (5), 459–466.
- 797 (50) ASHRAE. *Ventilation for Acceptable Indoor Air Quality: ANSI/ASHRAE Standard 62.1-*  
798 *2019*; ANSI/ASHRAE, 2019.
- 799 (51) ASHRAE. *ASHRAE Position Document on Infectious Aerosols*; American Society of  
800 Heating, Refrigerating and Air-Conditioning Engineers, 2020.
- 801 (52) REHVA. *How to Operate HVAC and Other Building Service Systems to Prevent the*  
802 *Spread of the Coronavirus (SARS-CoV-2) Disease (COVID-19) in Workplaces*; Federation  
803 of European Heating, Ventilation and Air Conditioning Associations, 2020.
- 804 (53) Chen, P. Z.; Bobrovitz, N.; Premji, Z.; Koopmans, M.; Fisman, D. N.; Gu, F. X.  
805 Heterogeneity in Transmissibility and Shedding SARS-CoV-2 via Droplets and Aerosols.  
806 *Elife* **2021**, 10, e65774.
- 807 (54) Yang, Q.; Saldi, T. K.; Gonzales, P. K.; Lasda, E.; Decker, C. J.; Tat, K. L.; Fattor, W. T.;  
808 Meyerson, N. R.; Paige, C. L.; Gilchrist, A. R.; Barbachano-guerrero, A. Just 2% of SARS-  
809 CoV-2-positive Individuals Carry 90% of the Virus Circulating in Communities. *Proceedings*  
810 *of the National Academy of Sciences* **2021**, 118 (21), e2104547118.
- 811 (55) Wu, S. L.; Mertens, A. N.; Crider, Y. S.; Nguyen, A.; Pokpongkiat, N. N.; Djajadi, S.;  
812 Seth, A.; Hsiang, M. S.; Colford, J. M.; Reingold, A.; Arnold, B. F.; Hubbard, A.; Benjamin-  
813 Chung, J. Substantial Underestimation of SARS-CoV-2 Infection in the United States.  
814 *Nature Communications*. 2020. <https://doi.org/10.1038/s41467-020-18272-4>.
- 815 (56) Jones, T. C.; Biele, G.; Mühlemann, B.; Veith, T.; Schneider, J.; Beheim-Schwarzbach,  
816 J.; Bleicker, T.; Tesch, J.; Schmidt, M. L.; Sander, L. E.; Kurth, F.; Menzel, P.; Schwarzer,  
817 R.; Zuchowski, M.; Hofmann, J.; Krumbholz, A.; Stein, A.; Edelman, A.; Corman, V. M.;  
818 Drosten, C. Estimating Infectiousness throughout SARS-CoV-2 Infection Course. *Science*  
819 **2021**, 373 (6551). <https://doi.org/10.1126/science.abi5273>.
- 820 (57) Park, S. Y.; Kim, Y. M.; Yi, S.; Lee, S.; Na, B. J.; Kim, C. B.; Kim, J. I.; Kim, H. S.; Kim,  
821 Y. B.; Park, Y.; Huh, I. S.; Kim, H. K.; Yoon, H. J.; Jang, H.; Kim, K.; Chang, Y.; Kim, I.; Lee,  
822 H.; Gwack, J.; Kim, S. S.; Kim, M.; Kweon, S.; Choe, Y. J.; Park, O.; Park, Y. J.; Jeong, E.  
823 K. Coronavirus Disease Outbreak in Call Center, South Korea. *Emerg. Infect. Dis.* **2020**, 26  
824 (8), 1666–1670.
- 825 (58) Khanh, N. C.; Thai, P. Q.; Quach, H.-L.; Thi, N.-A. H.; Dinh, P. C.; Duong, T. N.; Mai, L.  
826 T. Q.; Nghia, N. D.; Tu, T. A.; Quang, L. N.; Quang, T. D.; Nguyen, T.-T.; Vogt, F.; Anh, D.  
827 D. Transmission of SARS-CoV 2 During Long-Haul Flight. *Emerg. Infect. Dis.* **2020**, 26  
828 (11), 2617–2624.

- 829 (59) Günther, T.; Czech-Sioli, M.; Indenbirken, D.; Robitaille, A.; Tenhaken, P.; Exner, M.;  
830 Ottinger, M.; Fischer, N.; Grundhoff, A.; Brinkmann, M. M. SARS-CoV-2 Outbreak  
831 Investigation in a German Meat Processing Plant. *EMBO Mol. Med.* **2020**, *12* (12), e13296.
- 832 (60) Kriegel, M.; Buchholz, U.; Gastmeier, P.; Bischoff, P.; Abdelgawad, I.; Hartmann, A.  
833 Predicted Infection Risk for Aerosol Transmission of SARS-CoV-2. *medRxiv* **2020**,  
834 2020.10.08.20209106.
- 835 (61) Stein-Zamir, C.; Abramson, N.; Shoob, H.; Libal, E.; Bitan, M.; Cardash, T.; Cayam, R.;  
836 Miskin, I. A Large COVID-19 Outbreak in a High School 10 Days after Schools' Reopening,  
837 Israel, May 2020. *Eurosurveillance* **2020**, *25* (29), 1–5.
- 838 (62) Nardell, E. A.; Keegan, J.; Cheney, S. A.; Etkind, S. C. Airborne Infection: Theoretical  
839 Limits of Protection Achievable by Building Ventilation. *Am. Rev. Respir. Dis.* **1991**, *144* (2),  
840 302–306.
- 841 (63) Gammaitoni, L.; Nucci, M. C. Using a Mathematical Model to Evaluate the Efficacy of TB  
842 Control Measures. *Emerg. Infect. Dis.* **1997**, *3* (3), 335–342.
- 843 (64) Moser, M. R.; Bender, T. R.; Margolis, H. S.; Noble, G. R.; Kendal, A. P.; Ritter, D. G. An  
844 Outbreak of Influenza Aboard a Commercial Airliner. *Am. J. Epidemiol.* **1979**, *110* (1), 1–6.
- 845 (65) Remington, P. L. Airborne Transmission of Measles in a Physician's Office. *JAMA* **1985**,  
846 *253* (11), 1574.
- 847 (66) Wilson, N. M.; Marks, G. B.; Eckhardt, A.; Clarke, A. M.; Young, F. P.; Garden, F. L.;  
848 Stewart, W.; Cook, T. M.; Tovey, E. R. The Effect of Respiratory Activity, Non-Invasive  
849 Respiratory Support and Facemasks on Aerosol Generation and Its Relevance to COVID-  
850 19. *Anaesthesia* **2021**. <https://doi.org/10.1111/anae.15475>.
- 851 (67) James, G.; Witten, D.; Hastie, T.; Tibshirani, R. *An Introduction to Statistical Learning:*  
852 *With Applications in R*, 1st ed.; Springer texts in statistics; Springer: New York, NY, 2013.
- 853 (68) Milton, D. K.; Fabian, M. P.; Cowling, B. J.; Grantham, M. L.; McDevitt, J. J. Influenza  
854 Virus Aerosols in Human Exhaled Breath: Particle Size, Culturability, and Effect of Surgical  
855 Masks. *PLoS Pathog.* **2013**, *9* (3), e1003205.
- 856 (69) Lindsley, W. G.; Noti, J. D.; Blachere, F. M.; Thewlis, R. E.; Martin, S. B.; Othumpangat,  
857 S.; Noorbakhsh, B.; Goldsmith, W. T.; Vishnu, A.; Palmer, J. E.; Clark, K. E.; Beezhold, D.  
858 H. Viable Influenza A Virus in Airborne Particles from Human Coughs. *J. Occup. Environ.*  
859 *Hyg.* **2015**, *12* (2), 107–113.
- 860 (70) Yan, J.; Grantham, M.; Pantelic, J.; Bueno de Mesquita, P. J.; Albert, B.; Liu, F.;  
861 Ehrman, S.; Milton, D. K. Infectious Virus in Exhaled Breath of Symptomatic Seasonal  
862 Influenza Cases from a College Community. *Proceedings of the National Academy of*  
863 *Sciences* **2018**, *115* (5), 1081–1086.
- 864 (71) Tiemersma, E. W.; van der Werf, M. J.; Borgdorff, M. W.; Williams, B. G.; Nagelkerke, N.  
865 J. D. Natural History of Tuberculosis: Duration and Fatality of Untreated Pulmonary  
866 Tuberculosis in HIV Negative Patients: A Systematic Review. *PLoS One* **2011**, *6* (4),  
867 e17601.
- 868 (72) Bueno de Mesquita, P. J.; Noakes, C. J.; Milton, D. K. Quantitative Aerobiologic Analysis  
869 of an Influenza Human Challenge-transmission Trial. *Indoor Air* **2020**, *30* (6), 1189–1198.
- 870 (73) Mikszewski, A.; Stabile, L.; Buonanno, G.; Morawska, L. THE AIRBORNE  
871 CONTAGIOUSNESS OF RESPIRATORY VIRUSES: A COMPARATIVE ANALYSIS AND  
872 IMPLICATIONS FOR MITIGATION. *medRxiv* **2021**.  
873 <https://doi.org/10.1101/2021.01.26.21250580>.
- 874 (74) Conly, J.; on behalf of the WHO Infection Prevention and Control Research and  
875 Development Expert Group for COVID-; Seto, W. H.; Pittet, D.; Holmes, A.; Chu, M.;  
876 Hunter, P. R. Use of Medical Face Masks versus Particulate Respirators as a Component  
877 of Personal Protective Equipment for Health Care Workers in the Context of the COVID-19  
878 Pandemic. *Antimicrob. Resist. Infect. Control* **2020**, *9* (1), 126.
- 879 (75) Klompas, M.; Baker, M. A.; Rhee, C. Airborne Transmission of SARS-CoV-2: Theoretical

- 880 Considerations and Available Evidence. *JAMA* **2020**, 324 (5), 441–442.
- 881 (76) Tang, J. W.; Bahnfleth, W. P.; Bluysen, P. M.; Buonanno, G.; Jimenez, J. L.; Kurnitski,  
882 J.; Li, Y.; Miller, S.; Sekhar, C.; Morawska, L.; Marr, L. C.; Melikov, A. K.; Nazaroff, W. W.;  
883 Nielsen, P. V.; Tellier, R.; Wargocki, P.; Dancer, S. J. Dismantling Myths on the Airborne  
884 Transmission of Severe Acute Respiratory Syndrome Coronavirus-2 (SARS-CoV-2). *J.*  
885 *Hosp. Infect.* **2021**, 110, 89–96.
- 886 (77) WHO. *Roadmap to Improve and Ensure Good Indoor Ventilation in the Context of*  
887 *COVID-19*; World Health Organization, 2021.
- 888 (78) Rudnick, S. N.; Milton, D. K. Risk of Indoor Airborne Infection Transmission Estimated  
889 from Carbon Dioxide Concentration. *Indoor Air* **2003**, 13 (3), 237–245.

890
